# Supplementary material for: Transmission of viruses via our microbiomes
Source: PubMed Central journal article supplement (PMC5134127; doi:10.1186/s40168-016-0212-z), 2016-12-02
Supplement: 40168_2016_212_MOESM1_ESM.pdf [file 40168_2016_212_MOESM1_ESM.pdf]

**Table S1. Study Subjects**

|          | <b>Subject</b> | <b>Age</b> | <b>Sex</b> | <b>Ethnicity</b> | <b>Antibiotic</b> | <b>Vegetarian</b> | <b>Couple or Roommate</b> |
|----------|----------------|------------|------------|------------------|-------------------|-------------------|---------------------------|
| House 1  | CA05           | 23         | F          | Caucasian        | Amoxicillin       | No                | Couple                    |
|          | CA06           | 24         | M          | Caucasian        | None              | No                | Couple                    |
| House 2  | CA13           | 31         | F          | Caucasian        | Amoxicillin       | No                | Couple                    |
|          | CA14           | 27         | F          | Caucasian        | None              | No                | Couple                    |
| House 3  | CA23           | 34         | M          | Caucasian        | Amoxicillin       | No                | Couple                    |
|          | CA24           | 21         | M          | Caucasian        | None              | No                | Couple                    |
| House 4  | CA27           | 24         | M          | Caucasian        | Amoxicillin       | No                | Couple                    |
|          | CA28           | 24         | F          | Caucasian        | None              | No                | Couple                    |
| House 5  | CA11           | 19         | F          | Asian            | Azithromycin      | No                | Couple                    |
|          | CA12           | 20         | M          | Latino           | None              | No                | Couple                    |
| House 6  | CA15           | 24         | M          | Asian            | Azithromycin      | No                | Roommate                  |
|          | CA16           | 21         | M          | Asian            | None              | No                | Roommate                  |
| House 7  | CA39           | 63         | M          | Asian            | Azithromycin      | No                | Roommate                  |
|          | CA40           | 60         | M          | Latino           | None              | No                | Roommate                  |
| House 8  | CA47           | 24         | F          | Caucasian        | Azithromycin      | No                | Couple                    |
|          | CA48           | 25         | M          | Caucasian        | None              | No                | Couple                    |
| Controls | CA81           | 19         | F          | Caucasian        | None              | No                | Neither                   |
|          | CA85           | 21         | M          | Asian            | None              | No                | Neither                   |
|          | CA87           | 28         | F          | Latino           | None              | No                | Neither                   |
|          | CA90           | 19         | F          | Asian            | None              | No                | Neither                   |

**Table S2. Viral homologues within and between households**

| <b>By Subject</b> | <b>Percent Homologous within Household<sup>a</sup></b> | <b>Percent Homologous between Households<sup>a</sup></b> | <b>P value<sup>b</sup></b> |
|-------------------|--------------------------------------------------------|----------------------------------------------------------|----------------------------|
| <b>Feces</b>      |                                                        |                                                          |                            |
| House 1           | 32.77 ± 7.80                                           | 5.25 ± 5.60                                              | <b>0.0039</b>              |
| House 2           | 18.16 ± 5.27                                           | 3.90 ± 3.78                                              | <b>0.0163</b>              |
| House 3           | 34.43 ± 5.43                                           | 1.50 ± 1.84                                              | <b>&lt;0.0001</b>          |
| House 4           | 6.37 ± 5.80                                            | 2.04 ± 2.92                                              | 0.2219                     |
| House 5           | 17.63 ± 5.12                                           | 4.58 ± 4.43                                              | <b>0.0454</b>              |
| House 6           | 15.41 ± 3.94                                           | 5.68 ± 7.43                                              | 0.0600                     |
| House 7           | 27.12 ± 22.45                                          | 4.68 ± 7.49                                              | 0.0808                     |
| House 8           | 38.86 ± 10.27                                          | 5.50 ± 4.94                                              | <b>0.0030</b>              |
| <b>Saliva</b>     |                                                        |                                                          |                            |
| House 1           | 17.30 ± 7.19                                           | 2.46 ± 4.27                                              | <b>0.0298</b>              |
| House 2           | 14.21 ± 9.55                                           | 6.77 ± 8.36                                              | 0.2336                     |
| House 3           | 12.60 ± 12.95                                          | 4.90 ± 6.87                                              | 0.2733                     |
| House 4           | 31.91 ± 18.39                                          | 4.47 ± 6.28                                              | <b>0.0501</b>              |
| House 5           | 26.64 ± 5.38                                           | 7.28 ± 7.61                                              | <b>0.0192</b>              |
| House 6           | 21.79 ± 17.21                                          | 7.04 ± 9.42                                              | 0.1409                     |
| House 7           | 7.33 ± 3.70                                            | 4.04 ± 6.28                                              | 0.2126                     |
| House 8           | 26.12 ± 15.57                                          | 9.08 ± 9.98                                              | 0.1512                     |

<sup>a</sup>Based on the mean of 10,000 iterations. 10,000 random contigs were sampled per iteration

<sup>b</sup>Empirical p-value based on the fraction of times the estimated percent homologous reads within each household exceeds that for different households.

**Table S3: Primer sequences used in this study**

| <b>Primer Name</b> | <b>Primer Sequence (5'-3')</b> |
|--------------------|--------------------------------|
| Contig71-13F       | GTACTTATTGCCAACCATTG           |
| Contig71-392R      | CATTAGAGTACAAATCCC             |
| Contig71-370F      | TCTCAGGGATTTGTACTC             |
| Contig71-754R      | CTGCTTCCTTAGCTTCATT            |
| Contig71-739F      | GAAGCTAAGGAAGCAGTAA            |
| Contig71-1188R     | TGCTTTGGTTAACTGGTC             |
| Contig71-1173F     | CCAGTTAACCAAAGCAACA            |
| Contig71-1732R     | CCACCTTTAAATTCTCCC             |
| Contig71-1711F     | GCATGGGAGAATTTAAAGG            |
| Contig71-2110R     | CATATACTACACCACCAAC            |
| Contig71-2091F     | AGTTGGTGGTGTAGTATATG           |
| Contig71-2480R     | GCTTTTTTCCTTTCTTCCTC           |
| Contig71-2461F     | GAGGAAGAAAGGAAAAAAGC           |
| Contig71-2876R     | ACCCACCAAATTCATATTC            |
| Contig71-2867F     | TTGGTGGGGTAATAAGGG             |
| Contig71-3394R     | TCTAAAGAACAGGTGGGG             |
| Contig71-3376F     | GCCCCACCTGTTCTTTAG             |
| Contig71-3911R     | ACCCAATATCCAGAATCACC           |
| Contig71-3893F     | GTGATTCTGGATATTGGGTT           |
| Contig71-4461R     | GGCCAGTTGGATTATTGT             |
| Contig71-4476F     | TACCGTGAAATACCTATCC            |
| Contig71-4918R     | GTTAACTTACCATCTCTACC           |
| Contig71-4894F     | TGGATGGTAGAGATGGTAAG           |
| Contig71-5654R     | TGGGTTTGGATTACGTGG             |
| Contig71-5639F     | ACGTAATCCAAACCCACAA            |
| Contig71-6172R     | CCAGCTTTTTCTGCTTCTC            |
| Contig71-6183F     | GGCACTGCTAGGTCAAAA             |
| Contig71-6588R     | CCATGAAAACAACCTCCAA            |
| Contig71-6631F     | AGAATTTGAGGGTGGTGA             |
| Contig71-7201R     | GACCGGTAGTATATGTAATG           |
| Contig71-7195F     | ACCGGTCTAGTAACTTCA             |
| Contig71-7605R     | GGCTGTTATCCTTGGTTC             |
| Contig71-7587F     | GGAACCAAGGATAACAGC             |
| Contig71-8269R     | TTGGTCTGAGGGTATATCG            |
| Contig71-8251F     | CGATATACCCTCAGACCA             |
| Contig71-8595R     | TCATAGTCAGAACCACCA             |
| Contig71-8578F     | TGGTGGTTCTGACTATGA             |
| Contig71-9236R     | GACCTTCCCCATAGAATTT            |
| Contig71-9219F     | AATTCTATGGGGAAGGTC             |
| Contig71-9673R     | ATATCAGGGGTAACATCCA            |

|                 |                      |
|-----------------|----------------------|
| Contig71-9723F  | GGGGTATTAGTAAAAGGTG  |
| Contig71-10314R | AGTTTGGAGTAGGATGGA   |
| Contig71-10299F | CATCCTACTCCAAACTGAA  |
| Contig71-10871R | GAGGTTGATTGGTCCATA   |
| Contig71-10855F | ATGGACCAATCAACCTCT   |
| Contig71-11323R | GCTCTTGCATTTATACCG   |
| Contig71-11337F | GGTGACCCAGATAAGGAAA  |
| Contig71-11678R | CCAAAAACACAAAGAGCAG  |
| Contig71-11535F | TAGTTGAGTTGATGGTGAG  |
| Contig71-11971R | GGAATGCTTATACTAGAC   |
| Contig71-11954F | GTCTAGTATAAGCATTCC   |
| Contig71-12570R | TAGAGTAAAGTAACCTGG   |
| Contig71-12553F | CCAGGTTACTTTACTCTA   |
| Contig71-13088R | GTTTTCTTGGCTTTTGGT   |
| Contig71-12985F | ATAATCCCCACTCCATAC   |
| Contig71-13551R | TCTTTTTGATGCTTCCCT   |
| Contig71-13535F | GGGAAGCATCAAAAAGAA   |
| Contig71-14028R | ATTTACCATCTCTACCAC   |
| Contig71-14007F | TATTGTGGTAGAGATGGT   |
| Contig71-14613R | GGTATCTGGATATTGCTT   |
| Contig71-14566F | TGGGAGAAAAAGGAATTG   |
| Contig71-15151R | GCCCATTGATTATCTGTT   |
| Contig71-15145F | AATGGGCTCAAATAAGGG   |
| Contig71-15606R | GTTGGGCTTTTTTCATTC   |
| Contig71-15577F | TGGAGGATTTGGGAAATG   |
| Contig71-16001R | TTGAGTTGGGATTATTGG   |
| Contig71-15982F | AACCAATAATCCCAACTC   |
| Contig71-16637R | TACCTTTTCCCCTATAACC  |
| Contig71-16529F | ATTTATTGGGGATGTGGTAG |
| Contig71-17112R | TTCTATGATTGCCATGCC   |

---
